# Supplementary material for: Lung Ultrasound Reproducibly Outperforms Computed Tomography in the Detection of Extravascular Lung Water in Patients Undergoing Haemodialysis
Source: MDPI journal article supplement (doi:10.3390/diagnostics14060589), 2024-03-11
Supplement: s1 [file s1]

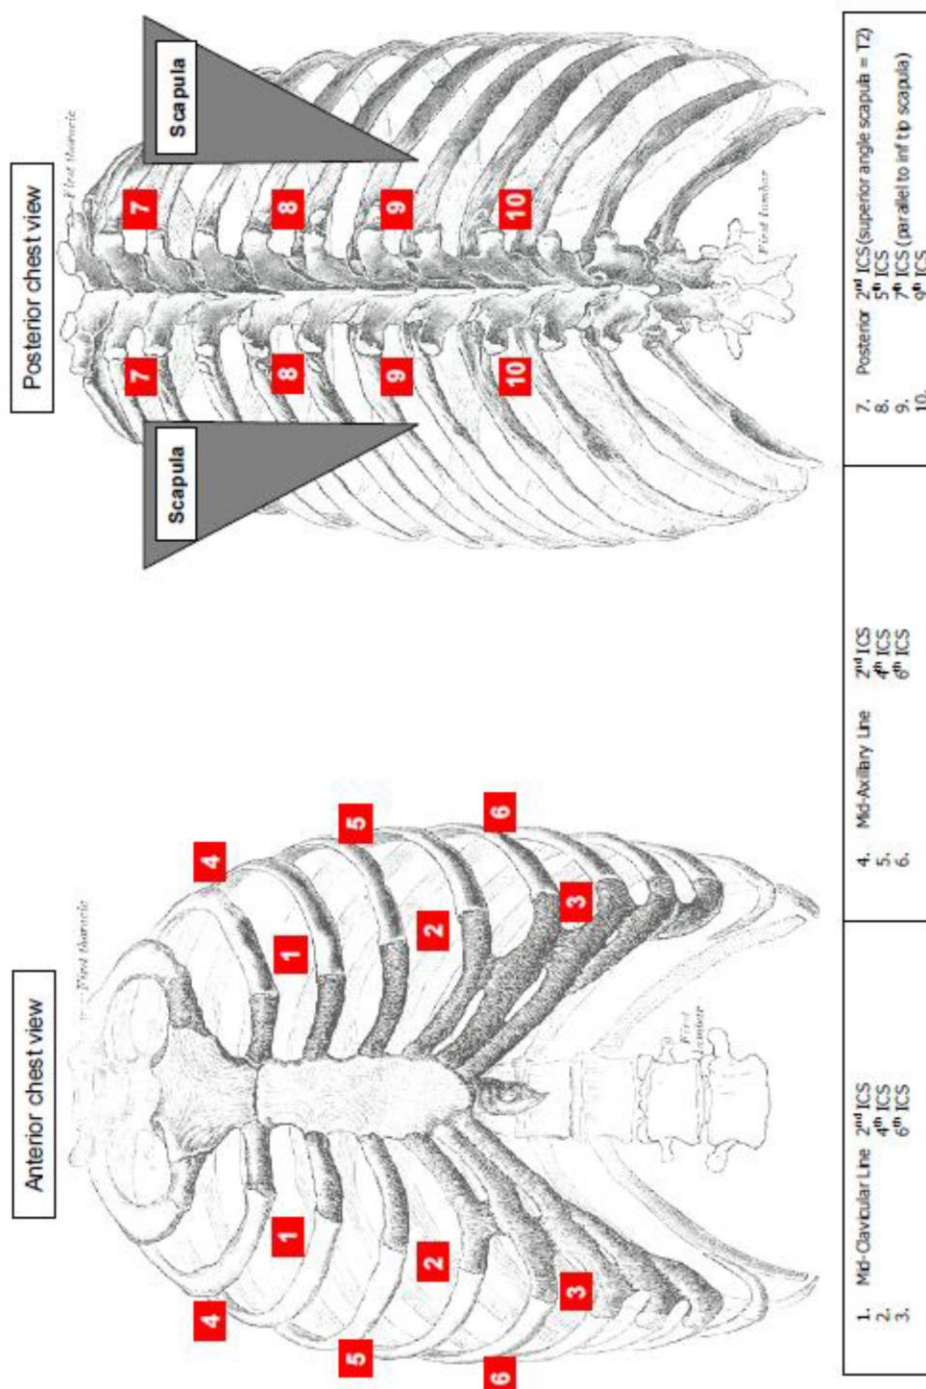

Figure S1. LUS exam protocol.

6-10 second clips to be acquired at 10 points across each hemithorax as above
