# Supplementary material for: Lung Ultrasound Reproducibly Outperforms Computed Tomography in the Detection of Extravascular Lung Water in Patients Undergoing Haemodialysis
Source: MDPI journal article supplement (doi:10.3390/diagnostics14060589), 2024-03-11

**Figure S2:** Individual patient data (n = 22; excludes patients with minimal B-lines on baseline (pre-dialysis) ultrasound) showing change in total B-line score (y-axis) vs. fluid removed during dialysis (x-axis) with similar trends but variation in absolute scores from different scorers. (\* patients with evidence of fluid overload on pre-dialysis CT scan; # patients with interstitial lung disease)

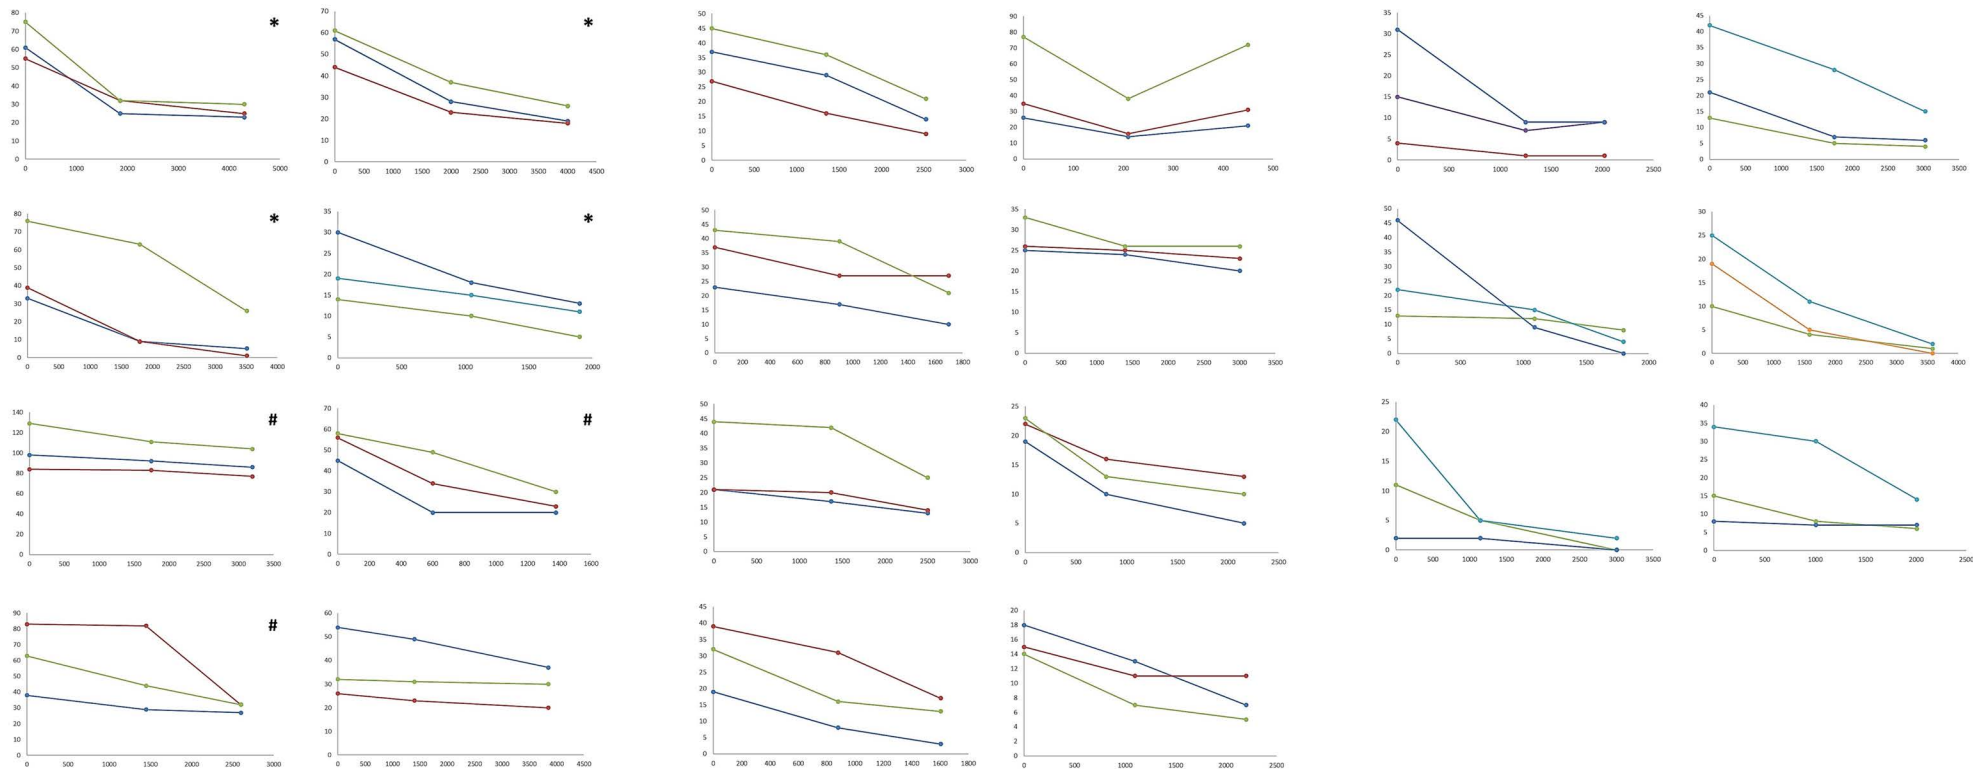

Supplement: s1 [file s1]
